# Supplementary material for: OsbHLHq11, the Basic Helix-Loop-Helix Transcription Factor, Involved in Regulation of Chlorophyll Content in Rice
Source: MDPI journal article supplement (doi:10.3390/biology11071000), 2022-07-01
Supplement: s1 [file s1]

**Table S1.** 26 chlorophyll content-related genes in RM26981-RM287 on chromosome 11.

| Function           | Locus                 | Description                                                                       |
|--------------------|-----------------------|-----------------------------------------------------------------------------------|
| Transporter        | <i>LOC_Os11g37130</i> | Twin-arginine translocation protein TatB family protein.                          |
|                    | <i>LOC_Os11g37660</i> | Protein prenyltransferase domain containing protein.                              |
|                    | <i>LOC_Os11g37700</i> | Similar to PDR11 ABC transporter.                                                 |
|                    | <i>LOC_Os11g39020</i> | Similar to ABCF-type protein.                                                     |
|                    | <i>LOC_Os11g37330</i> | Protein prenyltransferase domain containing protein.                              |
| Signaling          | <i>LOC_Os11g35310</i> | Phytosulfokine family protein.                                                    |
|                    | <i>LOC_Os11g38260</i> | PAP fibrillin family protein.                                                     |
| RNA binding        | <i>LOC_Os11g37990</i> | CRS1/YhbY domain containing protein.                                              |
|                    | <i>LOC_Os11g37510</i> | Similar to 50S ribosomal protein L4.                                              |
| Protein binding    | <i>LOC_Os11g38040</i> | Thioredoxin domain 2 containing protein.                                          |
|                    | <i>LOC_Os11g39140</i> | Thioredoxin domain 2 containing protein.                                          |
| Nucleotide binding | <i>LOC_Os11g37260</i> | Similar to GTP-binding protein-like; root hair defective 3 protein-like.          |
|                    | <i>LOC_Os11g39540</i> | Similar to 14-3-3 protein.                                                        |
| Kinase             | <i>LOC_Os11g35500</i> | Protein kinase-like domain containing protein.                                    |
|                    | <i>LOC_Os11g36150</i> | Similar to Receptor kinase-like protein.                                          |
|                    | <i>LOC_Os11g36160</i> | Similar to Receptor kinase-like protein.                                          |
|                    | <i>LOC_Os11g36190</i> | Similar to Receptor kinase-like protein.                                          |
|                    | <i>LOC_Os11g36200</i> | Similar to Receptor kinase-like protein.                                          |
| DNA binding        | <i>LOC_Os11g35320</i> | BSD domain containing protein.                                                    |
|                    | <i>LOC_Os11g36030</i> | HMG-I and HMG-Y, DNA-binding domain containing protein.                           |
|                    | <i>LOC_Os11g38870</i> | Basic helix-loop-helix dimerisation region bHLH domain containing protein.        |
|                    | <i>LOC_Os11g39000</i> | Basic helix-loop-helix dimerisation region bHLH domain containing protein.        |
| Catalytic activity | <i>LOC_Os11g34210</i> | Similar to Glutamyl-tRNA(Gln) amidotransferase subunit B (EC 6.3.5.-) (Fragment). |
|                    | <i>LOC_Os11g35710</i> | Terpene synthase family protein.                                                  |
|                    | <i>LOC_Os11g43200</i> | Similar to Short chain alcohol dehydrogenase-like.                                |
|                    | <i>LOC_Os11g43360</i> | Similar to Short chain alcohol dehydrogenase-like.                                |
